# Supplementary material for: PepeSearch: Semantic Data for the Masses
Source: PLoS One. 2016 Mar 11;11(3):e0151573. doi: 10.1371/journal.pone.0151573 (PMC4788387; doi:10.1371/journal.pone.0151573)
Supplement: S1 File — (XLSX) [file pone.0151573.s001.xlsx]

## Sheet: Participants
PID	Sex	Age range	You are currently…	Field	Rate your abilities with computers	Rate your abilities with the Internet	Rate your abilities with computer searches	Rate your abilities with web searches	How often do you make a search of a Norwegian company?		Aprox. Age
P1	Female	25-34	A student	Library	Average	Good	Average	Good	A few times a month or less		30
P2	Female	18-24	A student	Library	Good	Good	Good	Good	Every day or two		21
P3	Female	18-24	A student	Library	Good	Good	Good	Good	Never		21
P4	Female	18-24	A student	Library	Average	Good	Good	Good	A few times a month or less		21
P6	Female	25-34	A student	Library	Good	Good	Very good	Very good	A few times a month or less		30
P12	Male	18-24	A student	Informatics	Very good	Very good	Very good	Very good	Never		21
P15	Male	25-34	A student	Informatics	Good	Good	Average	Good	A few times a month or less		30
P16	Male	18-24	A Phd student	Informatics	Very good	Good	Good	Good	A few times a month or less		21
P18	Female	35-44	Researcher	Informatics	Good	Good	Good	Good	Never		40
P19	Male	18-24	A student	Informatics	Very good	Very good	Very good	Good	Never		21
P20	Male	18-24	A student	Informatics	Very good	Very good	Very good	Very good	A few times a month or less		21
P23	Male	18-24	A student	Informatics	Very good	Very good	Good	Good	A few times a month or less		21
P24	Male	25-34	A student	Informatics	Very good	Good	Good	Good	A few times a month or less		30
P25	Male	25-34	A student	Informatics	Very good	Good	Good	Good	A few times a month or less		30
P30	Male	18-24	A student	Informatics	Very good	Very good	Good	Good	Once a week		21
											25.2667
											5.93376

## Sheet: F-measure
Duration (sg)	Participant identifier	Task	F-measure			F-measure
134.01	P3	Income	0.333333
309.006	P16	Accommodation	0.625
344.186	P2	Rennemo	1		PID	F-1	F-2	F-3	avg F-measure
421.768	P04	Accommodation	1		P1	1	0.333333	0	0.444444
150.448	P16	Brønnøy	1		P2	1	1	0.375	0.791667
447.539	P1	Wireless	1		P3	0.333333	0.75	1	0.694444
152.617	P04	Brønnøy	1		P04	1	1	1	1
316.072	P2	Income	1		P06	0.909091	0.75	1	0.886364
357.485	P1	Rennemo	0.333333		P12	0.857143	1	1	0.952381
921.407	P15	Income	1		P15	1	0.875	1	0.958333
803.544	P3	Accommodation	0.75		P16	0.625	1	0.142857	0.589286
1457.78	P25	Wireless	1		P18	1	0.75	1	0.916667
140.102	P3	Brønnøy	1		P19	0.5	1	1	0.833333
370.383	P15	Accommodation	0.875		P20	1	1	1	1
516.571	P1	Income	0		P23	1	0.285714	0.75	0.678571
758.021	P04	Dairy	1		P24	0.857143	1	1	0.952381
370.763	P25	Rennemo	1		P25	1	1	0	0.666667
681.502	P2	Accommodation	0.375		P30	1	1	1	1
166.025	P15	Brønnøy	1
1548.08	P12	Dairy	0.857143
1571.01	P24	Dairy	0.857143					mean	0.824303
358.483	P12	Wireless	1					std	0.173078
131.191	P20	Brønnøy	1
567.256	P19	Accommodation	0.5
112.284	P19	Brønnøy	1
701.092	P25	Income	0					sqrt(n)	3.87298
172.38	P30	Income	1
1753.61	P16	Dairy	0.142857					TARGET F	0.71
240.749	P06	Income	0.909091					t	2.55775
378.334	P23	Rennemo	1
223.47	P30	Accommodation	1					p-value	0.988614	0.0113861
216.337	P19	Dairy	1
397.51	P18	Income	1					interval	0.0737362
452.886	P12	Rennemo	1
458.08	P20	Dairy	1
208.322	P06	Accommodation	0.75
215.388	P30	Brønnøy	1
1151.36	P24	Wireless	1
271.113	P20	Wireless	1
205.088	P06	Brønnøy	1
360.185	P18	Accommodation	0.75
574.024	P23	Income	0.285714
237.785	P18	Brønnøy	1
418.319	P24	Rennemo	1
692.697	P23	Accommodation	0.75
498.584	mean

## Sheet: Usability
Participant identifier	I find this tool useful for finding information about companies	I judge the tool to be simple	Finding information about companies with this tool was easy	I was able to find the information that I wanted	I judge the tool to be ordered	I judge the tool to be meaningful	Becoming skillful at using the tool was easy	I judge the tool to be comprehensible	I knew the right things to do	Learning to use this tool was easy		AVG		SUS
P3	7	4	5	6	5	5	4	4	3	4		4.7		61.6667
P1	6	4	6	5	5	6	5	6	6	4		5.3		71.6667
P2	5	4	4	5	5	5	3	4	3	5		4.3		55
P04	7	6	7	7	6	6	6	6	6	6		6.3		88.3333
P15	7	6	6	5	6	7	6	6	5	6		6		83.3333
p25	6	6	7	7	5	7	7	6	7	5		6.3		88.3333
P16	6	6	6	5	5	6	5	7	5	6		5.7		78.3333
P19	6	7	5	5	6	6	6	6	6	7		6		83.3333
P12	7	5	5	6	3	6	6	4	5	1		4.8		63.3333
P30	7	7	7	6	6	7	7	7	7	7		6.8		96.6667
P20	6	7	6	6	7	7	7	7	7	7		6.7		95
P06	7	7	7	7	7	7	7	7	6	7		6.9		98.3333
P18	4	4	2	5	4	3	2	4	3	4		3.5		41.6667
P24	6	6	6	6	6	6	6	6	4	5		5.7		78.3333
P23	4	5	3	3	5	4	3	4	3	4		3.8		46.6667
											mean	5.52		75.3333
											std	1.08378		18.0629
													sqrt(n)	3.87298
													TARGET SUS	67		Mean Web SUS (Table 8.7)
													t	1.7868
													p-value	0.952183	0.047817
													interval	7.69532
